# Supplementary material for: Artemisia annua Leaf Extract Attenuates Hepatic Steatosis and Inflammation in High-Fat Diet-Fed Mice
Source: PubMed Central journal article supplement — J Med Food. 2016 Mar 1;19(3):290–9. doi: 10.1089/jmf.2015.3527 (PMC4799707; doi:10.1089/jmf.2015.3527), 2016-03-01
Supplement: Supp_Table1.pdf [file Supp_Table1.pdf]

## Supplementary Data

SUPPLEMENTARY TABLE S1. LIST OF PRIMARY ANTIBODIES

| <i>Antibody</i> | <i>Company</i> | <i>Catalog No.</i> | <i>Dilution</i> | <i>Applications</i> | <i>Source</i> |
|-----------------|----------------|--------------------|-----------------|---------------------|---------------|
| SREBP1          | BD             | 557036             | 1:1000          | WB                  | Mouse         |
| ChREBP          | Novus          | NB400-135          | 1:1000          | WB                  | Rabbit        |
| p-ACC           | Cell Signaling | #3661              | 1:1000          | WB                  | Rabbit        |
| ACC             | Cell Signaling | #3662              | 1:1000          | WB                  | Rabbit        |
| HMGB1           | Abcam          | ab18256            | 1:5000          | WB                  | Rabbit        |
| RAGE            | Santa Cruz     | sc-5563            | 1:1000          | WB                  | Rabbit        |
| CTGF            | Abcam          | ab6992             | 1:1000          | WB                  | Rabbit        |
| TGF- $\beta$ 1  | Santa Cruz     | sc-146             | 1:1000          | WB                  | Rabbit        |
| COX-2           | Cayman         | 160126             | 1:1000          | WB                  | Rabbit        |
| p84             | Abcam          | ab487              | 1:1000          | WB                  | Mouse         |
| $\beta$ -Actin  | Sigma-Aldrich  | A5441              | 1:1000          | WB                  | Mouse         |

ACC, acetyl-CoA carboxylase; ChREBP, carbohydrate-responsive element-binding protein; COX-2, cyclooxygenase-2; CTGF, connective tissue growth factor; HMGB1, high-mobility group box 1; SREBP, sterol regulatory element-binding protein; TGF, transforming growth factor; WB, western blot.
