# Supplementary material for: Artemisia annua Leaf Extract Attenuates Hepatic Steatosis and Inflammation in High-Fat Diet-Fed Mice
Source: PubMed Central journal article supplement — J Med Food. 2016 Mar 1;19(3):290–9. doi: 10.1089/jmf.2015.3527 (PMC4799707; doi:10.1089/jmf.2015.3527), 2016-03-01
Supplement: Supp_Tables2-4.pdf [file Supp_Tables2-4.pdf]

SUPPLEMENTARY TABLE S2. NMR SPECTROSCOPIC DATA (500 MHz, DMSO) FOR COMPOUNDS 4–6

| No. of carbon      | 4. Isorhamnetin |                      | 5. Chrysosplenetin |                      | 6. Acacetin |                      |
|--------------------|-----------------|----------------------|--------------------|----------------------|-------------|----------------------|
|                    | $\delta_C$      | $\delta_H$ (J in Hz) | $\delta_C$         | $\delta_H$ (J in Hz) | $\delta_C$  | $\delta_H$ (J in Hz) |
| 2                  | 146.6           | —                    | 156.0              | —                    | 164.7       | —                    |
| 3                  | 135.8           | —                    | 138.7              | —                    | 104.0       | 6.87, s              |
| 4                  | 175.9           | —                    | 178.9              | —                    | 182.2       | —                    |
| 5                  | 160.7           | —                    | 152.8              | —                    | 161.9       | —                    |
| 6                  | 98.2            | 5.75, d (2)          | 132.3              | —                    | 99.4        | 6.21, d (2)          |
| 7                  | 164.0           | —                    | 158.8              | —                    | 162.8       | —                    |
| 8                  | 93.6            | 6.03, d (2)          | 90.4               | 6.50, s              | 94.5        | 6.51, d (2)          |
| 9                  | 156.2           | —                    | 152.3              | —                    | 157.8       | —                    |
| 10                 | 103.3           | —                    | 106.6              | —                    | 104.2       | —                    |
| 1'                 | 121.7           | —                    | 122.4              | —                    | 123.3       | —                    |
| 2'                 | 111.7           | 7.31, d (2.5)        | 110.9              | 7.71, m              | 128.8       | 8.03, dd (2, 7)      |
| 3'                 | 147.4           | —                    | 146.4              | —                    | 115.0       | 7.11, dd (2, 7)      |
| 4'                 | 148.8           | —                    | 148.4              | —                    | 163.8       | —                    |
| 5'                 | 115.6           | 6.49, d (8)          | 114.6              | —                    | 115.0       | 7.11, dd (2, 7)      |
| 6'                 | 122.0           | 7.25, dd (2.5, 8)    | 122.6              | 7.67, m              | 128.8       | 8.03, dd (2, 7)      |
| 3-OCH <sub>3</sub> | —               | —                    | —                  | —                    | 60.1        | 3.80, s              |
| 6-OCH <sub>3</sub> | —               | —                    | —                  | —                    | 60.5        | 3.73, s              |
| 7-OCH <sub>3</sub> | —               | —                    | —                  | —                    | 56.9        | 3.92, s              |
| 3'-OMe             | 55.8            | 3.4, s               | 60.2               | 3.99, s              | —           | —                    |
| 4'-OMe             | —               | —                    | —                  | —                    | 56.0        | 3.87, s              |
| 3-OMe              | —               | —                    | 56.3               | 3.87, s              | —           | —                    |
| 6-OMe              | —               | —                    | 60.9               | 3.92, s              | —           | —                    |
| 7-OMe              | —               | —                    | 56.1               | 3.96, s              | —           | —                    |

DMSO, dimethyl sulfoxide; NMR, nuclear magnetic resonance.

SUPPLEMENTARY TABLE S3. NMR SPECTROSCOPIC DATA (500 MHz, OR DMSO) FOR COMPOUNDS 7–9

| No. of carbon | 7. <i>Imperatorin</i> |                      | 8. <i>6,7-Dihydroxycoumarin</i> |                      | 9. <i>Scopoletin</i> |                      |
|---------------|-----------------------|----------------------|---------------------------------|----------------------|----------------------|----------------------|
|               | $\delta_C$            | $\delta_H$ (J in Hz) | $\delta_C$                      | $\delta_H$ (J in Hz) | $\delta_C$           | $\delta_H$ (J in Hz) |
| 2             | 159.6                 | —                    | 161.3                           | —                    | 161.1                | —                    |
| 3             | 114.3                 | 6.36, d (9.5)        | 111.2                           | 6.17, d (9.5)        | 112.1                | 6.22, d (9.5)        |
| 4             | 144.7                 | 8.05, d (9.5)        | 144.9                           | 7.87, d (9.5)        | 144.9                | 7.91, d (9.5)        |
| 5             | 113.9                 | 7.63, s              | —                               | 6.75, s              | 110.1                | 7.22, s              |
| 6             | 126.0                 | —                    | 143.3                           | —                    | 145.7                | —                    |
| 7             | 148.6                 | —                    | 150.9                           | —                    | 151.6                | —                    |
| 8             | 131.2                 | 6.03, d (2)          | 103.1                           | 6.99, s              | 103.2                | 6.78, s              |
| 9             | 144.0                 | —                    | 144.9                           | —                    | 150.0                | —                    |
| 10            | 116.7                 | —                    | 112.0                           | —                    | 110.0                | —                    |
| 1'            | —                     | —                    | 122.4                           | —                    | —                    | —                    |
| 2'            | —                     | 7.96, d (2)          | 110.9                           | —                    | —                    | —                    |
| 3'            | 106.9                 | 7.01, d (2)          | 146.4                           | —                    | —                    | —                    |
| 4'            | 148.8                 | —                    | 148.4                           | —                    | —                    | —                    |
| 5'            | 115.6                 | —                    | 114.6                           | —                    | —                    | —                    |
| 6'            | 122.0                 | —                    | 122.6                           | —                    | —                    | —                    |
| 2''           | 69.5                  | 4.98, d (7)          | —                               | —                    | —                    | —                    |
| 3''           | —                     | 5.57, m              | —                               | —                    | —                    | —                    |
| 5''           | 17.2                  | —                    | —                               | —                    | —                    | —                    |
| 6''           | 24.9                  | —                    | —                               | —                    | —                    | —                    |
| Me-5''        | —                     | 1.70, s              | —                               | —                    | —                    | —                    |
| Me-6''        | —                     | 1.72, s              | —                               | —                    | —                    | —                    |
| 6-OMe         | —                     | —                    | —                               | —                    | 56.5                 | 3.82, s              |

Imperatorin: NMR spectroscopic data (500 MHz, acetone-*d*<sub>6</sub>).

SUPPLEMENTARY TABLE S4. NMR SPECTROSCOPIC DATA (500 MHz, DMSO) FOR COMPOUNDS 10 AND 11

| No. of carbon | 10. Kaempferol 3- $\beta$ -D-glucoside |                      | 11. Quercetin-3- $\beta$ -D-glucoside |                      |
|---------------|----------------------------------------|----------------------|---------------------------------------|----------------------|
|               | $\delta_C$                             | $\delta_H$ (J in Hz) | $\delta_C$                            | $\delta_H$ (J in Hz) |
| 2             | 156.9                                  | —                    | 156.6                                 | —                    |
| 3             | 133.6                                  | —                    | 133.8                                 | 6.87, s              |
| 4             | 177.9                                  | —                    | 177.9                                 | —                    |
| 5             | 161.7                                  | —                    | 161.7                                 | —                    |
| 6             | 99.2                                   | 6.21, d (2)          | 99.1                                  | 6.21, d (2)          |
| 7             | 164.7                                  | —                    | 164.6                                 | —                    |
| 8             | 94.1                                   | 6.44, d (2)          | 94.0                                  | 6.41, d (2)          |
| 9             | 156.7                                  | —                    | 156.8                                 | —                    |
| 10            | 104.4                                  | —                    | 104.4                                 | —                    |
| 1'            | 121.4                                  | —                    | 121.6                                 | —                    |
| 2'            | 131.4                                  | 8.04, d (2)          | 115.7                                 | 7.59, d (2)          |
| 3'            | 115.6                                  | 6.89, d (9)          | 145.3                                 | 7.11, dd (2, 7)      |
| 4'            | 160.4                                  | —                    | 148.9                                 | —                    |
| 5'            | 115.6                                  | 6.89, d (9)          | 116.7                                 | 6.85, d (9)          |
| 6'            | 131.4                                  | 8.04, d (2)          | 122.1                                 | 7.57, dd (2.9)       |
| glc-C-1       | 101.3                                  | 5.46, d (7.5)        | 101.3                                 | 5.47, d (7.5)        |
| glc-C-2       | 74.7                                   | —                    | 74.6                                  | 3.73, s              |
| glc-C-3       | 78.0                                   | —                    | 78.0                                  | 3.92, s              |
| glc-C-4       | 70.3                                   | —                    | 70.4                                  | —                    |
| glc-C-5       | 76.9                                   | —                    | 77.0                                  | 3.87, s              |
| glc-C-6       | 61.3                                   | —                    | 61.4                                  | —                    |
| glucose       | —                                      | 3.58–3.09            | —                                     | 3.60–3.10            |
| 7-OMe         | —                                      | —                    | —                                     | —                    |
